# Supplementary material for: Sources and cycling of nitrogen in a New England river discerned fromnitrate isotope ratios
Source: Copernicus journal article supplement (doi:10.5194/bg-2020-390), 2020-11-04
Supplement: Supplementary file 1 [file bg-2020-390-supplement.pdf]

## Supplementary Materials:

### Sources and cycling of nitrogen in a New England river discerned from nitrate isotope ratios

Veronica R. Rollinson<sup>1</sup>, Julie Granger<sup>1</sup>, Sydney C. Clark<sup>2</sup>, Mackenzie L. Blanus<sup>1</sup>, Claudia P. Koerting<sup>1</sup>, Jamie  
5 M.P. Vaudrey<sup>1</sup>, Lija A. Treibergs<sup>1,4</sup>, Holly C. Westbrook<sup>1,3</sup>, Catherine M. Matassa<sup>1</sup>, Meredith K. Hastings<sup>2</sup>,  
Craig R. Tobias<sup>1</sup>

<sup>1</sup>Department of Marine Sciences, University of Connecticut, Groton, 06340, USA

<sup>2</sup>Department of Earth, Environmental and Planetary Sciences, Brown University, Providence, 02912, USA

<sup>3</sup>School of the Earth, Ocean and Environment, University of South Carolina, Columbia, 29208, USA

10 <sup>4</sup>Adirondack Watershed Institute, Paul Smith's College, Paul Smith's, 12970, USA

*Correspondence to:* Veronica R. Rollinson (veronica.rollinson@uconn.edu)

#### S1. Isotope composition of rainwater NO<sub>3</sub><sup>-</sup>

DIN concentrations in rainwater samples ranged from 2.3 to 56.4 μM (Figure S2a). Corresponding  
isotope ratios ranged from -6.1 to 1.7 ‰ for δ<sup>15</sup>N<sub>NO3</sub>, from 57.8 to 75.7 ‰ for δ<sup>18</sup>O<sub>NO3</sub>, and from 19.7 to  
15 27.2 ‰ for Δ<sup>17</sup>O<sub>NO3</sub> (Figure S2b).

Both δ<sup>18</sup>O<sub>NO3</sub> and Δ<sup>17</sup>O<sub>NO3</sub> values in local rainwater – measured only from early September through  
December 2018 – scaled directly with discharge at the Stillman Bridge (Fig. S2c), implicating an increase in  
both as a function of mean precipitation. In order to extrapolate these precipitation isotopic end-member  
values to the whole observation period, we imposed best-fit logarithmic function to rainwater δ<sup>18</sup>O<sub>NO3</sub> and  
20 Δ<sup>17</sup>O<sub>NO3</sub> values vs. daily river discharge measurements at the Stillman Bridge, using the latter as a proxy for  
precipitation. The precipitation δ<sup>18</sup>O<sub>NO3</sub> and Δ<sup>17</sup>O<sub>NO3</sub> end-member values thus derived were then used to (a)  
estimate the fraction of atmospheric NO<sub>3</sub><sup>-</sup> in river water (Fig. 2g) and (b) account for the influence of  
atmospheric NO<sub>3</sub><sup>-</sup> on riverine δ<sup>18</sup>O<sub>NO3</sub> (Fig. 2h).

Table S1. Pawcatuck River discharge and N loading statistics for the Westerly WWTF in 2018.

|                                                 | Min  | Max  | Mean | Median |
|-------------------------------------------------|------|------|------|--------|
| Discharge ( $10^4 \text{ m}^3 \text{ d}^{-1}$ ) | 0.5  | 2.1  | 1.0  | 0.9    |
| DIN flux ( $\times 10^3 \text{ mol N d}^{-1}$ ) | 0.2  | 11.3 | 3.2  | 2.7    |
| TON flux ( $\times 10^3 \text{ mol N d}^{-1}$ ) | <0.1 | 4.0  | 1.0  | 0.8    |
| TN flux ( $\times 10^3 \text{ mol N d}^{-1}$ )  | 0.9  | 13.2 | 4.1  | 3.7    |

**Table S2.** Summary of results from mixed-model ANOVAs testing the effects of river section (RivSect) and sampling date (Date) on multiple response variables (a-g). Sampling station was included in each model as a random effect. Numerator and denominator degrees of freedom ( $DF_n$  and  $DF_d$ , respectively) are given for each effect test and corresponding F ratio. River sections are as follows: Section 1: Stations 1 & 2; Section 2: Stations 3 & 4; Section 3: Stations 7-12; Section 4: Stations 13-15.

|            |                                     |                | $DF_n$ | $DF_d$ | F     | p        |
|------------|-------------------------------------|----------------|--------|--------|-------|----------|
| <b>(a)</b> | [NO <sub>3</sub> <sup>-</sup> ]     | RivSect        | 3      | 9      | 32.1  | < 0.0001 |
|            |                                     | Date           | 2      | 12     | 122.4 | < 0.0001 |
|            |                                     | RivSect x Date | 6      | 12     | 107.2 | < 0.0001 |
| <b>(b)</b> | $\delta^{15}\text{N}_{\text{NO}_3}$ | RivSect        | 3      | 9      | 26.2  | 0.0001   |
|            |                                     | Date           | 2      | 15     | 16.6  | 0.0002   |
| <b>(c)</b> | $\delta^{18}\text{O}_{\text{NO}_3}$ | RivSect        | 3      | 9      | 6.2   | 0.0141   |
|            |                                     | Date           | 2      | 15     | 0.7   | 0.5225   |
| <b>(d)</b> | [PO <sub>4</sub> <sup>3-</sup> ]    | RivSect        | 3      | 9      | 45.2  | <0.0001  |
|            |                                     | Date           | 2      | 12     | 72.0  | <0.0001  |
|            |                                     | RivSect x Date | 6      | 12     | 32.2  | <0.0001  |
| <b>(e)</b> | [NH <sub>4</sub> <sup>+</sup> ]     | RivSect        | 3      | 9      | 3.2   | 0.0778   |
|            |                                     | Date           | 2      | 12     | 8.8   | 0.0044   |
|            |                                     | RivSect x Date | 6      | 12     | 2.1   | 0.1238   |
| <b>(f)</b> | [PN]                                | RivSect        | 3      | 9      | 0.3   | 0.8029   |
|            |                                     | Date           | 2      | 16     | 0.3   | 0.7378   |
| <b>(g)</b> | Chl-a                               | RivSect        | 3      | 7      | 9.0   | 0.0085   |
|            |                                     | Date           | 1      | 7      | 1.4   | 0.2686   |
|            |                                     | RivSect x Date | 3      | 7      | 1.9   | 0.2110   |

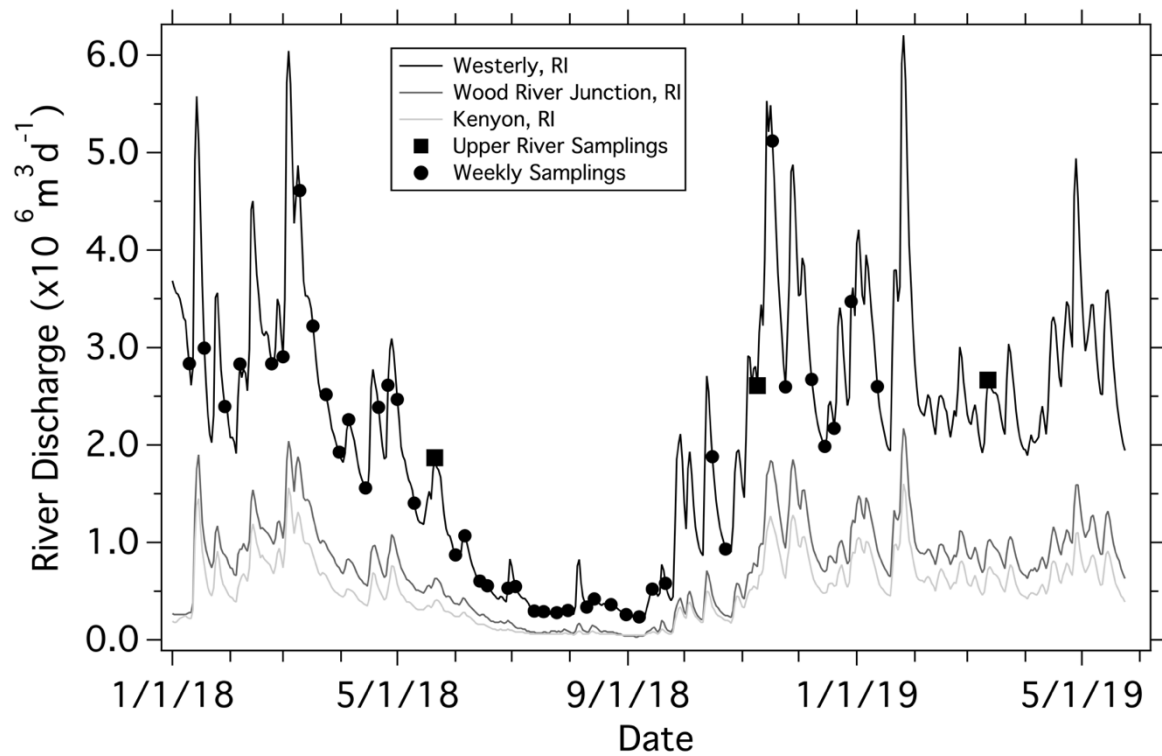

**Figure S1.** Mean daily river discharge at the three USGS discharge gauges along the Pawcatuck River, at Kenyon, Wood River Junction, and the Stillman Bridge in Westerly. Sampling dates indicated by symbols.

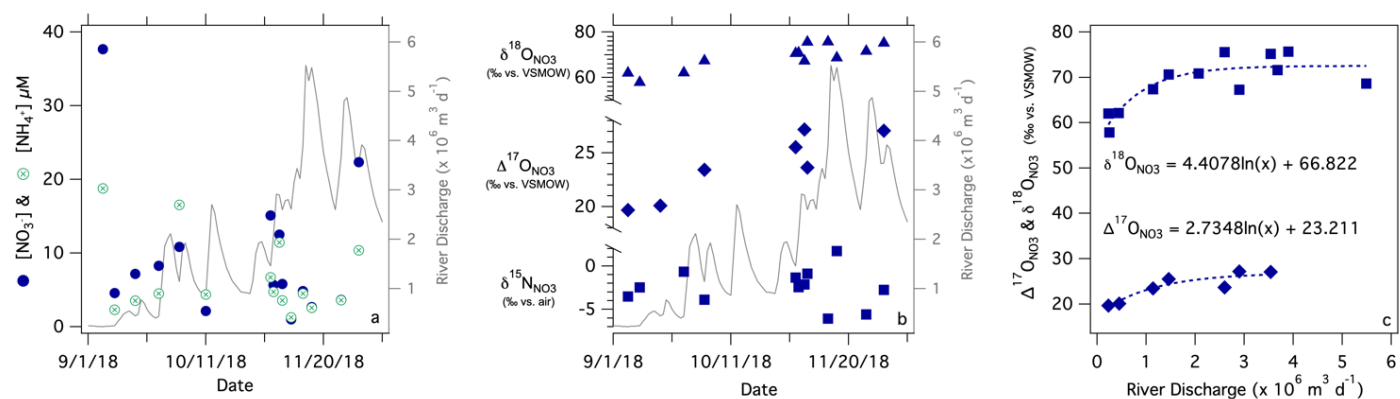

**Figure S2.** Solute concentrations and  $\text{NO}_3^-$  isotopologue ratios in rainwater collections at Avery Point, CT vs. sampling date: (a)  $[\text{NO}_3^-]$  &  $[\text{NH}_4^+]$ ; (b)  $\delta^{15}\text{N}_{\text{NO}_3}$ ,  $\delta^{18}\text{O}_{\text{NO}_3}$  &  $\Delta^{17}\text{O}_{\text{NO}_3}$ ; Grey line corresponds to the mean river discharge at the Stillman Bridge, which we use as a proxy to derive the precipitation isotopic end-members from (c) the log-linear fit of  $\delta^{18}\text{O}_{\text{NO}_3}$  &  $\Delta^{17}\text{O}_{\text{NO}_3}$  vs. river discharge.

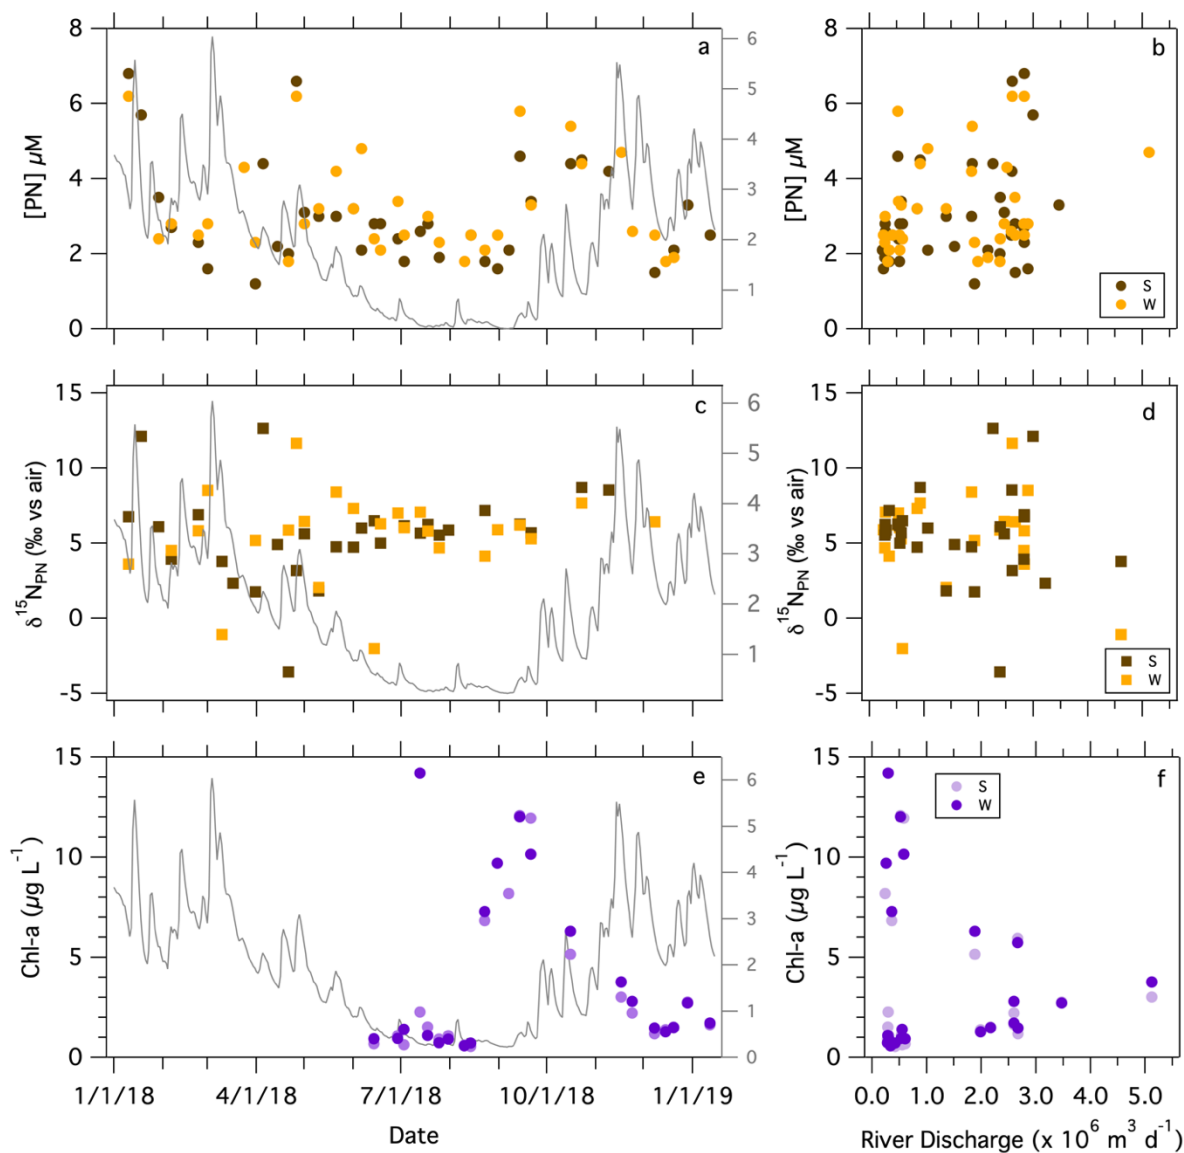

**Figure S3.** (a) Chlorophyll-a at the Stillman and Westerly bridges vs. sampling date (b) Chlorophyll-a vs. mean daily river discharge recorded at the Stillman Bridge (c) [PN] at the bridges vs. sampling date, (d) [PN] vs. mean daily river discharge. (e)  $\delta^{15}\text{N}_{\text{PN}}$  at the bridges vs. sampling date, (f)  $\delta^{15}\text{N}_{\text{PN}}$  vs. mean daily river discharge.

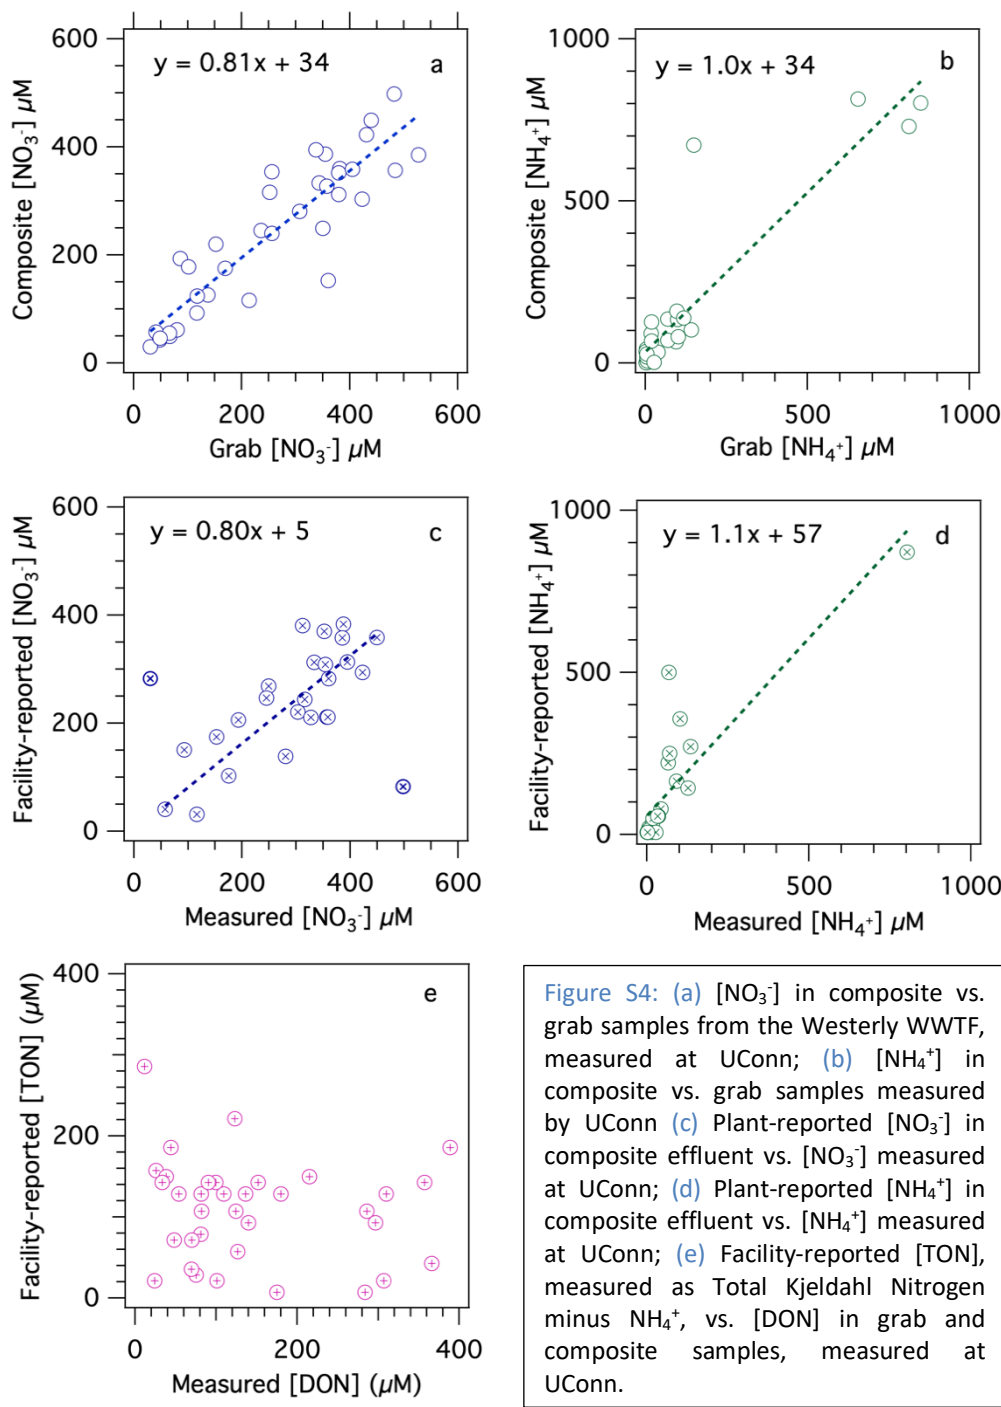

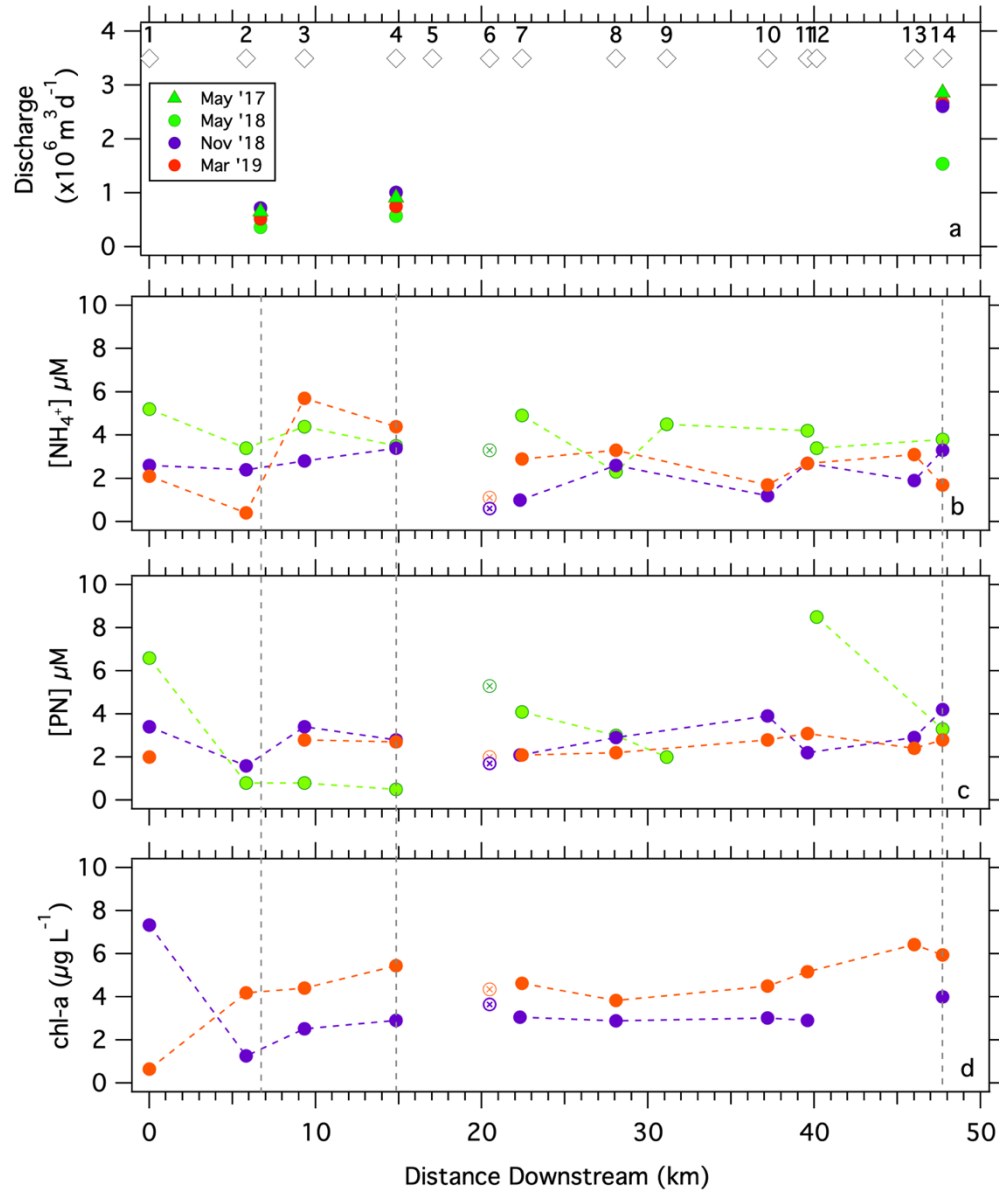

**Figure S5:** Solute concentrations observed at discrete locations along the Pawcatuck River from its origin at Worden Pond to the Westerly Bridge during discrete along-river sampling campaigns. (a) Mean daily river discharge recorded at three flow gauges along the Pawcatuck River during the sampling campaigns; (b)  $[\text{NH}_4^+]$ ; (c)  $[\text{PN}]$ ; and (d) chlorophyll-a.



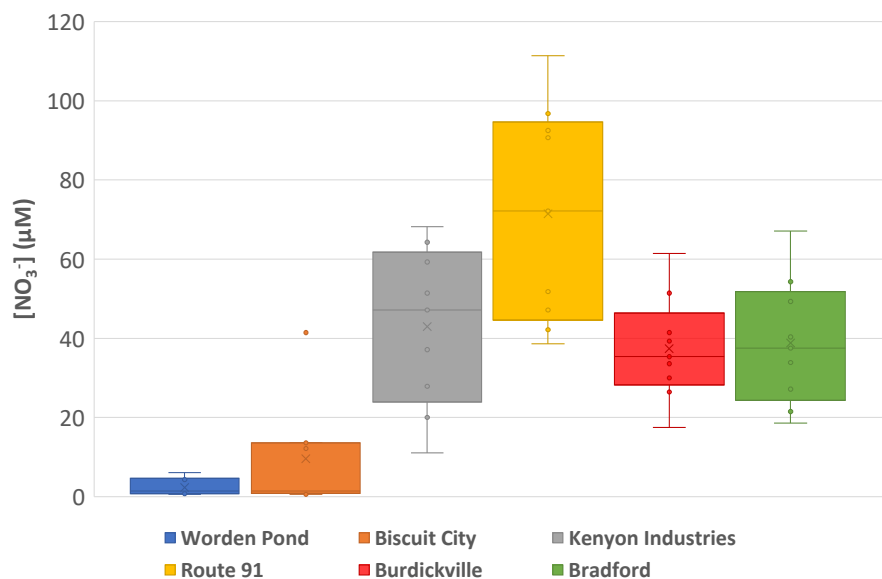

**Figure S6.** Box and whisker plot of median  $[\text{NO}_3^-]$  in samples collected in the month of October from 2007 to 2016 at locations along the upper Pawcatuck River by the Wood-Pawcatuck Watershed Association (WPWA, 2020). The top and bottom of each box are the 25<sup>th</sup> and 75<sup>th</sup> percentiles, distances between reflect the interquartile ranges, and the line inside each box is the sample median. Whiskers extending above and below capture population minima and maxima. Single data points outside of whiskers correspond to outliers

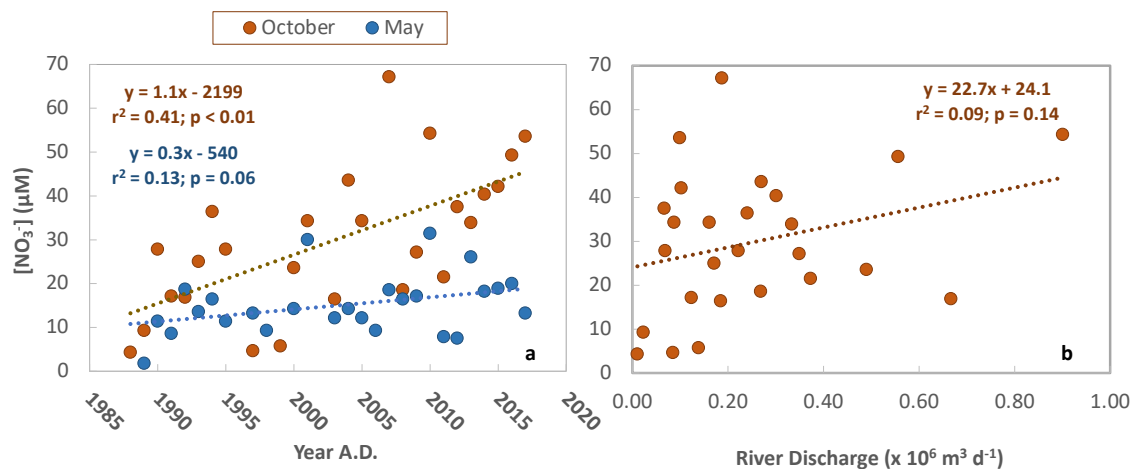

Figure S7. (a)  $[\text{NO}_3^-]$  in samples collected at Bradford (Station 8) on the Pawcatuck River, recorded from monthly samplings in May and in October from 1989 to 2016 by the Wood-Pawcatuck Watershed Association (WPWA, 2020). (b)  $[\text{NO}_3^-]$  in October vs. the monthly-averaged river discharge at Wood River Junction in the corresponding year. Regression lines are the least-squares linear fits, with corresponding  $r^2$  and probability statistics.
